# Supplementary material for: Efficient scavenging of Criegee intermediates on water by surface-active cis-pinonic acid
Source: Royal Society of Chemistry journal article supplement (doi:10.1039/c7cp03869k), 2017-01-01
Supplement: c7cp03869k1.pdf [file c7cp03869k1.pdf]

Supporting Information of:  
**Efficient scavenging of Criegee intermediates on water  
by surface-active *cis*-pinonic acid**

**Shinichi Enami<sup>\*a</sup> and A. J. Colussi<sup>\*b</sup>**

*<sup>a</sup>National Institute for Environmental Studies, 16-2 Onogawa, Tsukuba, Ibaraki 305-8506, Japan.*

*<sup>b</sup>Linde Center for Global Environmental Science, California Institute of Technology, California 91125, USA.*

\*Authors to whom correspondence should be addressed:

S.E. [enami.shinichi@nies.go.jp](mailto:enami.shinichi@nies.go.jp), phone: +81-29-850-2770

A.J.C. [ajcoluss@caltech.edu](mailto:ajcoluss@caltech.edu), phone: +1-626-395-6350

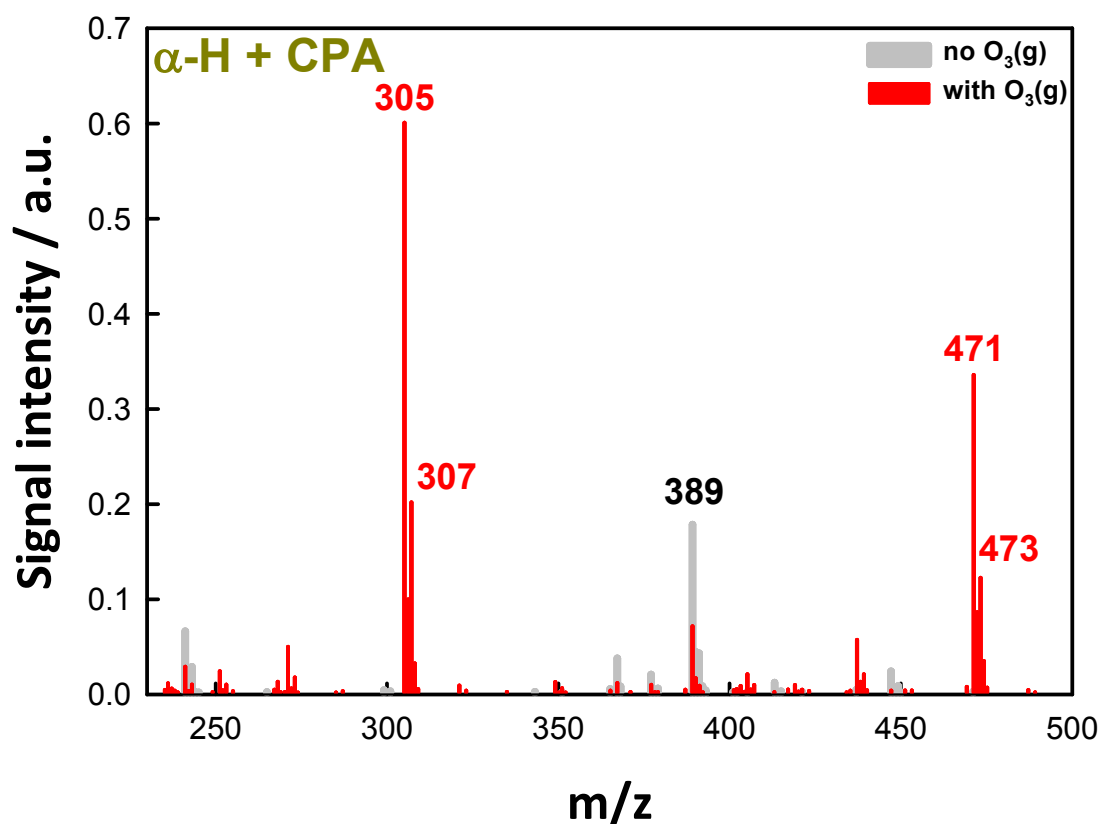

**FIGURE S1:** Negative ion mass spectra from 1 mM  $\alpha$ -humulene ( $\alpha\text{-H}$ ) + 0.2 mM NaCl + 10 mM *cis*-pinonic acid (CPA) in AN:H<sub>2</sub>O (4:1 = vol:vol) solution microjets in the absence (gray) and presence of  $\text{O}_3(\text{g})$  (red,  $E = 2.3 \times 10^{11}$  molecules  $\text{cm}^{-3}$  s). The m/z 305/307, 389 and 471/473 signals correspond to chloride-adducts of  $\alpha$ -hydroxy-hydroperoxides,  $\text{Na}(\text{CPA})_2^-$ , and chloride-adducts of  $\alpha$ -acyloxy-hydroperoxides, respectively. See text for details.

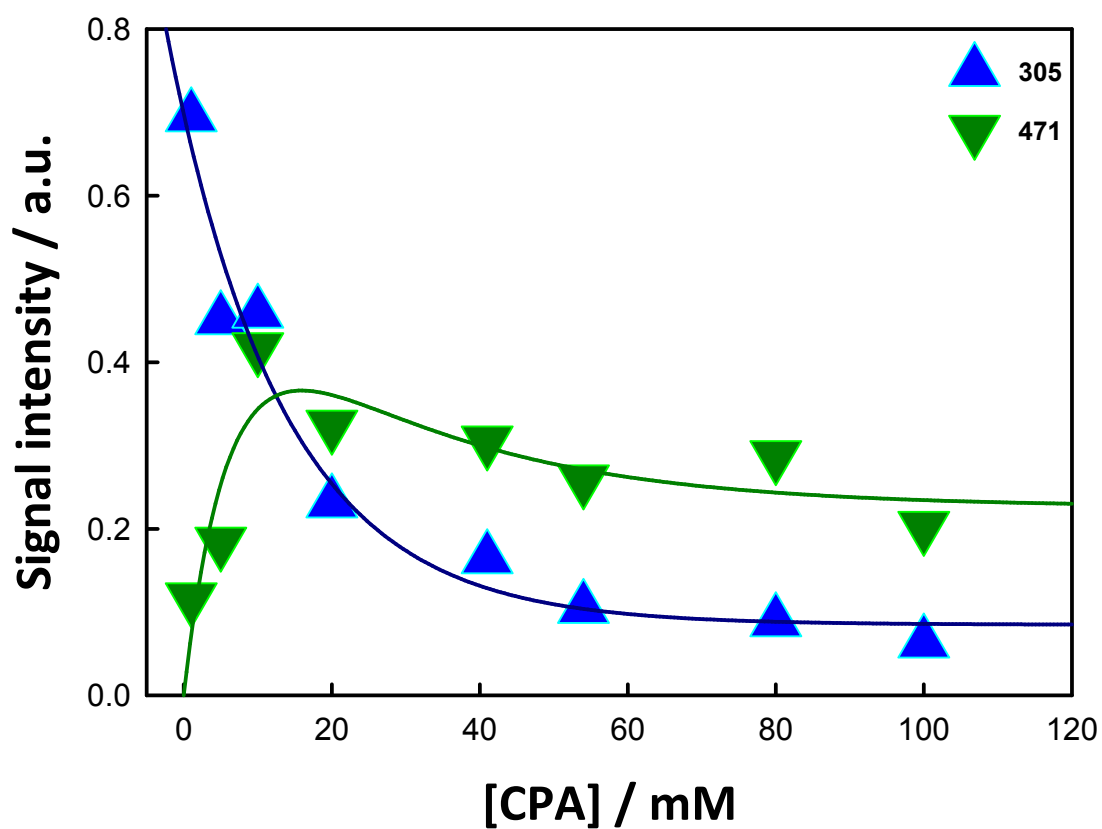

---

**FIGURE S2:** Signal intensities at  $m/z$  305 and 471 as a function of the concentration of added *cis*-pinonic acid (CPA) to 1mM  $\beta$ -caryophyllene + 0.2 mM NaCl in AN:H<sub>2</sub>O (4:1=vol:vol) solution microjets in the presence of O<sub>3</sub> ( $E = 2.4 \times 10^{11}$  molecules cm<sup>-3</sup> s). Connecting lines are guides to the eye. See text for details.

---
